# Supplementary material for: Eating behaviour, physical activity, TV exposure and sleeping habits in five year olds: a latent class analysis
Source: BMC Pediatr. 2021 Apr 17;21:180. doi: 10.1186/s12887-021-02640-0 (PMC8052652; doi:10.1186/s12887-021-02640-0)
Supplement: Supplementary file 1 — Additional file 1. [file 12887_2021_2640_MOESM1_ESM.docx]

**Eating behaviour, physical activity, TV exposure and sleeping habits in five year olds: a latent class analysis**

Molly Mattsson1*, Deirdre M Murray2, Mairead Kiely3, Fergus P McCarthy4, Elaine McCarthy4, Regien Biesma5#, Fiona Boland6#

1Division of Population Health Sciences, Royal College of Surgeons in Ireland, Dublin, Ireland

2Department of Paediatrics and Child Health, University College Cork, Cork, Ireland

3Cork Centre for Vitamin D and Nutrition Research, School of Food and Nutritional Sciences, University College Cork, Cork, Ireland

4Irish Centre for Maternal and Child Health Research, Cork University Maternity Hospital, University College Cork, Cork, Ireland

5University of Groningen, University Medical Center Groningen, Groningen, Netherlands

6Data Science Centre, Royal College of Surgeons in Ireland, Dublin, Ireland

*Corresponding author:

Molly Mattsson

RCSI Department of Epidemiology and Public Health Medicine

Beaux Lane House, Lower Mercer Street,

Dublin 2, Ireland

mollymattsson@rcsi.ie

#Authors contributed equally

**Child Eating Behaviour Questionnaire (CEBQ)**

Please read the following statements and tick the boxes most appropriate to your child’s eating behaviour.

|  | Never | Rarely | Some-times | Often | Always |  |
| --- | --- | --- | --- | --- | --- | --- |
| My child loves food | □ | □ | □ | □ | □ | EF |
| My child eats more when worried | □ | □ | □ | □ | □ | EOE |
| My child has a big appetite | □ | □ | □ | □ | □ | SR* |
| My child finishes his/her meal quickly | □ | □ | □ | □ | □ | SE* |
| My child is interested in food | □ | □ | □ | □ | □ | EF |
| My child is always asking for a drink | □ | □ | □ | □ | □ | DD |
| My child refuses new foods at first | □ | □ | □ | □ | □ | FF |
| My child eats slowly | □ | □ | □ | □ | □ | SE |
| My child eats less when angry | □ | □ | □ | □ | □ | EUE |
| My child enjoys tasting new foods | □ | □ | □ | □ | □ | FF* |
| My child eats less when s/he is tired | □ | □ | □ | □ | □ | EUE |
| My child is always asking for food | □ | □ | □ | □ | □ | FR |
| My child eats more when annoyed | □ | □ | □ | □ | □ | EOE |
| If allowed to, my child would eat too much | □ | □ | □ | □ | □ | FR |
| My child eats more when anxious | □ | □ | □ | □ | □ | EOE |
| My child enjoys a wide variety of foods | □ | □ | □ | □ | □ | FF* |
| My child leaves food on his/her plate at the end of a meal | □ | □ | □ | □ | □ | SR |
| My child takes more than 30 minutes to finish a meal | □ | □ | □ | □ | □ | SE |

|  | Never | Rarely | Some-times | Often | Always |  |
| --- | --- | --- | --- | --- | --- | --- |
| Given the choice, my child would eat most of the time | □ | □ | □ | □ | □ | FR |
| My child looks forward to mealtimes | □ | □ | □ | □ | □ | EF |
| My child gets full before his/her meal is finished | □ | □ | □ | □ | □ | SR |
| My child enjoys eating | □ | □ | □ | □ | □ | EF |
| My child eats more when she is happy | □ | □ | □ | □ | □ | EUE |
| My child is difficult to please with meals | □ | □ | □ | □ | □ | FF |
| My child eats less when upset | □ | □ | □ | □ | □ | EUE |
| My child gets full up easily | □ | □ | □ | □ | □ | SR |
| My child eats more when s/he has nothing else to do | □ | □ | □ | □ | □ | EOE |
| Even if my child is full up s/he finds room to eat his/her favourite food | □ | □ | □ | □ | □ | FR |
| If given the chance, my child would drink continuously throughout the day | □ | □ | □ | □ | □ | DD |
| My child cannot eat a meal if s/he has had a snack just before | □ | □ | □ | □ | □ | SR |
| If given the chance, my child would always be having a drink | □ | □ | □ | □ | □ | DD |
| My child is interested in tasting food s/he hasn’t tasted before | □ | □ | □ | □ | □ | FF* |
| My child decides that s/he doesn’t like a food, even without tasting it | □ | □ | □ | □ | □ | FF |
| If given the chance, my child would always have food in his/her mouth | □ | □ | □ | □ | □ | FR |
| My child eats more and more slowly during the course of a meal | □ | □ | □ | □ | □ | SE |

**SCORING OF THE CEBQ**

**(Never=1, Rarely=2, Sometimes=3, Often=4, Always=5)**

Food responsiveness = item mean FR

Emotional over-eating = item mean EOE

Enjoyment of food = item mean EF

Desire to drink = item mean DD

Satiety responsiveness = item mean SR

Slowness in eating = item mean SE

Emotional under-eating = item mean EUE

Food fussiness = item mean FF

*Reversed items

Wardle, J, Guthrie CA, Sanderson, S and Rapoport, L. Development of the Children’s Eating Behaviour Questionnaire. *Journal of Child Psychology and Psychiatry.* **42,** 2001, 963-970.
